# Supplementary material for: Photodegradation of methylene blue using CexZryO2 nanocomposites prepared via a non-stoichiometry method
Source: Royal Society of Chemistry journal article supplement (doi:10.1039/d3nj01696j), 2023-01-01
Supplement: d3nj01696j1.pdf [file d3nj01696j1.pdf]

## Photodegradation of Methylene Blue Using $\text{Ce}_x\text{Zr}_y\text{O}_2$ Nanocomposites

### Prepared via Non-stoichiometry Method

Xingmin Chen,<sup>a1</sup> Peishen Li,<sup>bc1</sup> Shuai Gao,<sup>b</sup> Mingming Sun,<sup>b</sup> Qiang Wang,<sup>b\*</sup> Wen Liu<sup>c</sup> and Sihui Zhan<sup>a\*</sup>

<sup>a</sup>College of Environmental Sciences and Engineering, Nankai University, Tianjin 300350, China. E-mail: sihuizhan@nankai.edu.cn

<sup>b</sup>Laboratory for Micro-sized Functional Materials & College of Elementary Education and Department of Chemistry, Capital Normal University, Beijing, 100048, China. E-mail: qwchem@gmail.com

<sup>c</sup>College of Environmental Sciences and Engineering, The Key Laboratory of Water and Sediment Sciences (MOE), Peking University, Beijing 100871, China.

<sup>1</sup>The authors contributed equally to this paper.

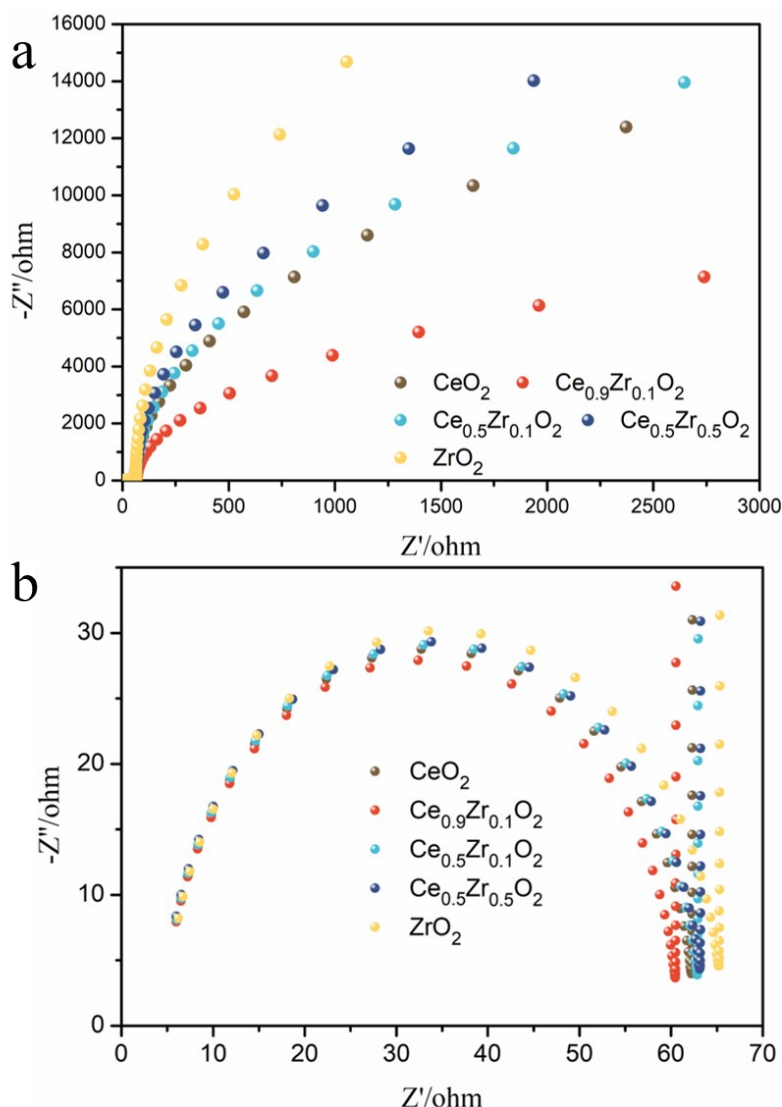

Fig. S1 (a) and (b) Nyquist plots of the various  $\text{Ce}_x\text{Zr}_y\text{O}_2$  nanocomposites,  $\text{CeO}_2$  and  $\text{ZrO}_2$ .

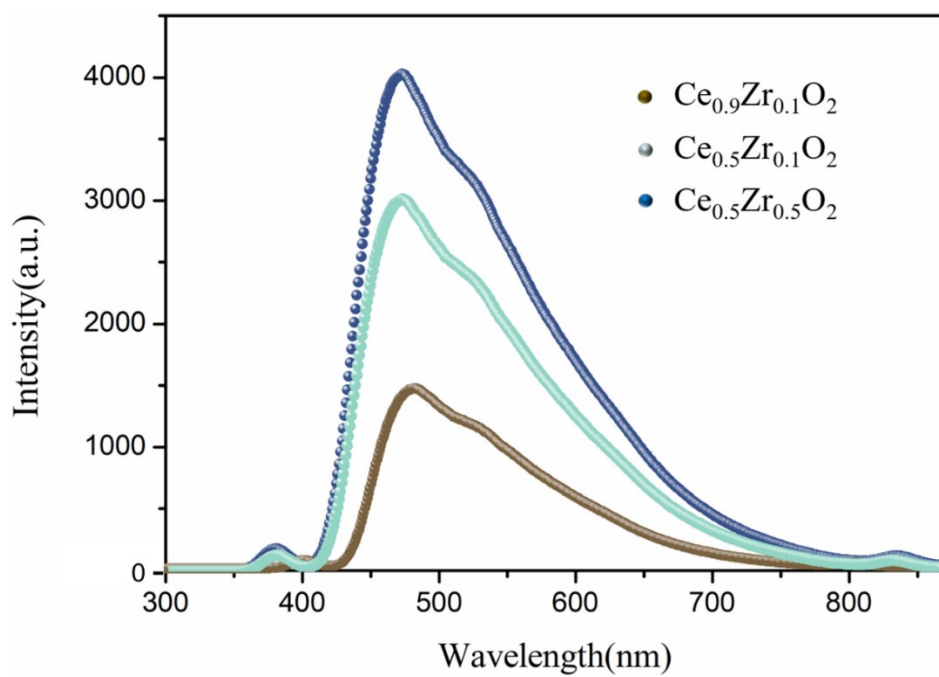

Fig. S2 The PL spectral data graph of  $\text{Ce}_x\text{Zr}_y\text{O}_2$ .

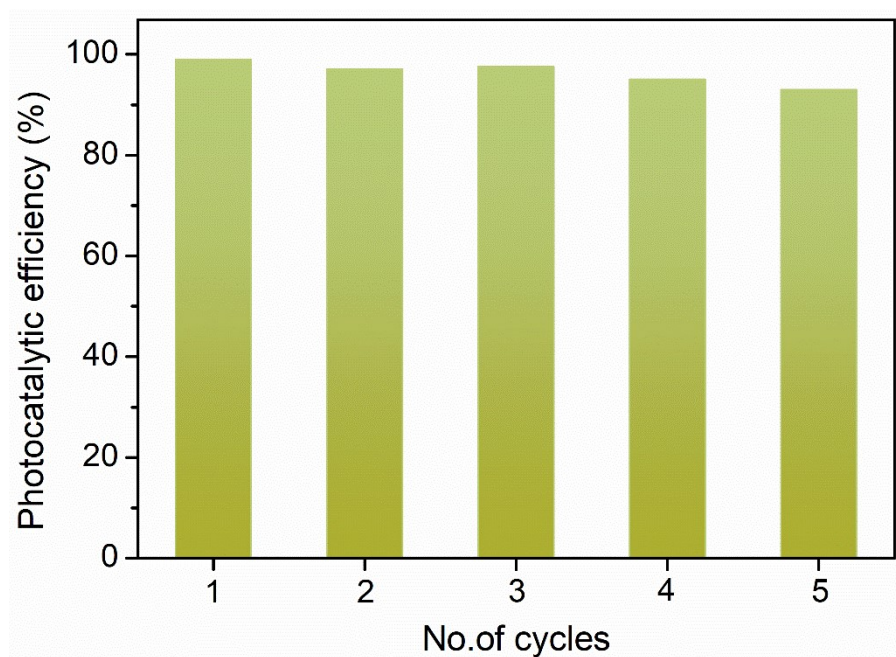

Fig. S3 Repeated photocatalytic tests of  $\text{Ce}_{0.9}\text{Zr}_{0.1}\text{O}_2$ .

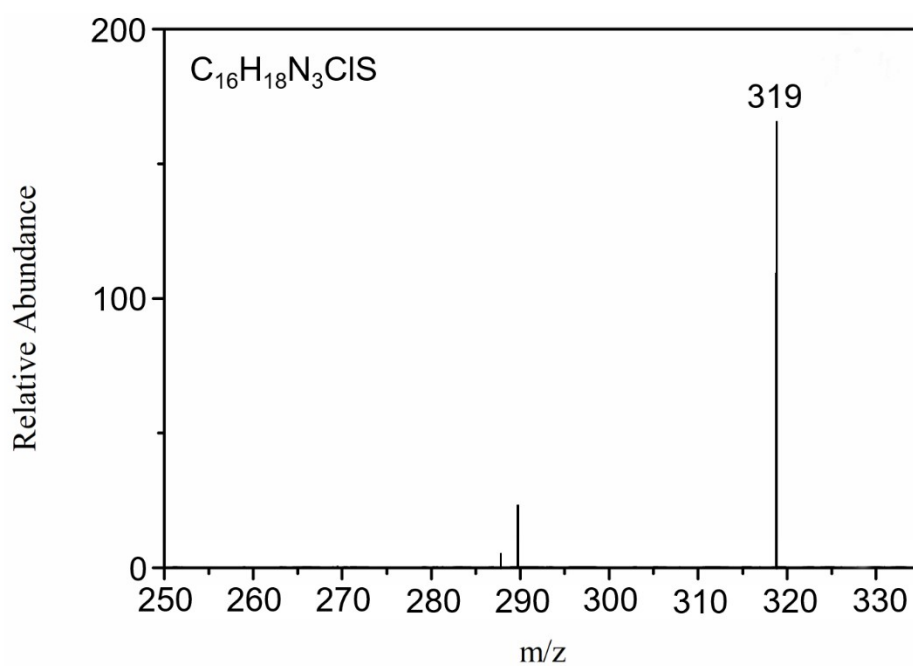

Fig. S4 Mass spectrum of MB during photocatalytic degradation reaction.

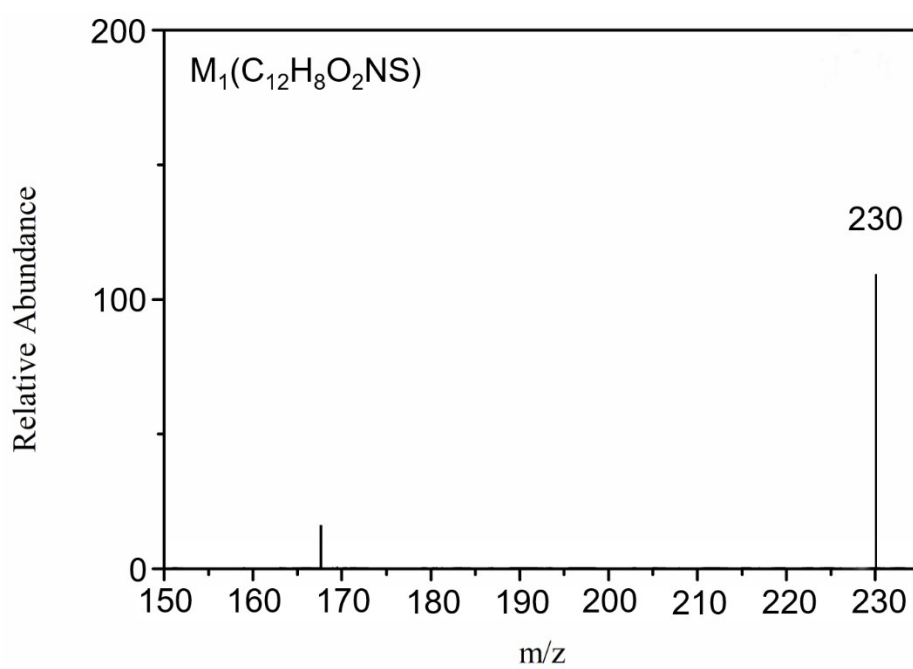

Fig. S5 Mass spectrum of reaction products  $M_1$  during photocatalytic degradation of MB.

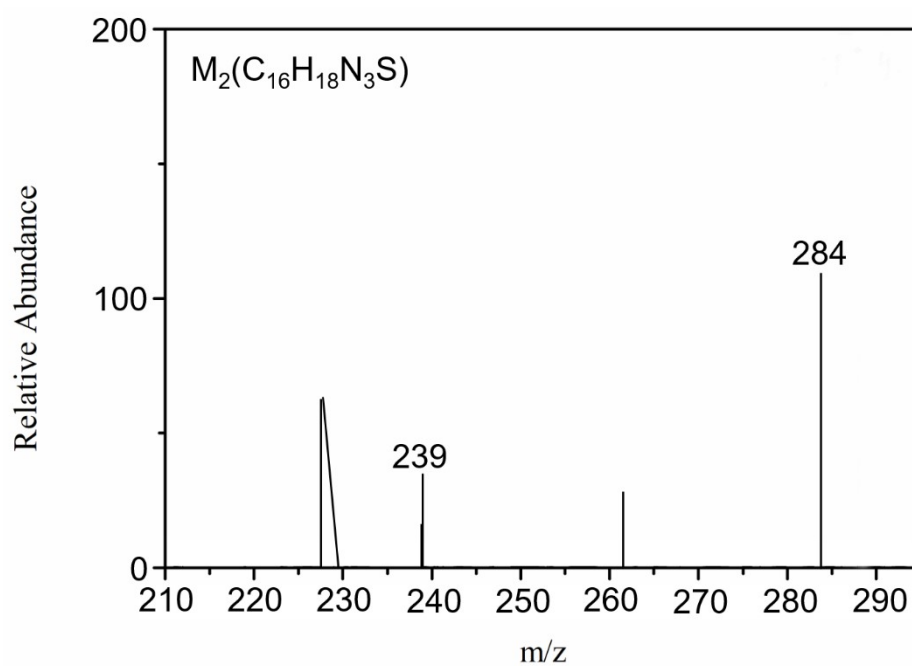

Fig. S6 Mass spectrum of reaction products  $M_2$  during photocatalytic degradation of MB.

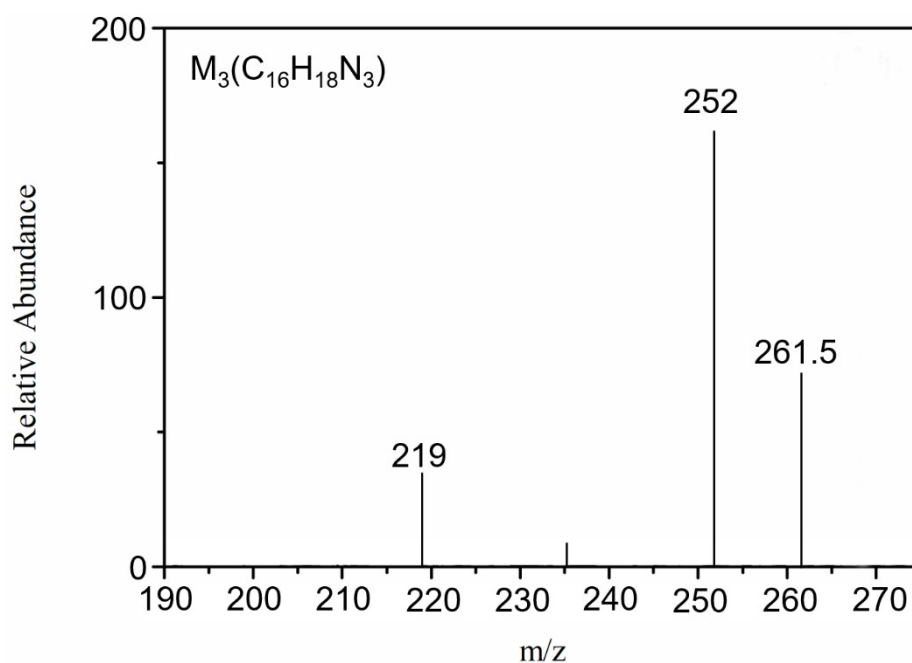

Fig. S7 Mass spectrum of reaction products  $M_3$  during photocatalytic degradation of MB.

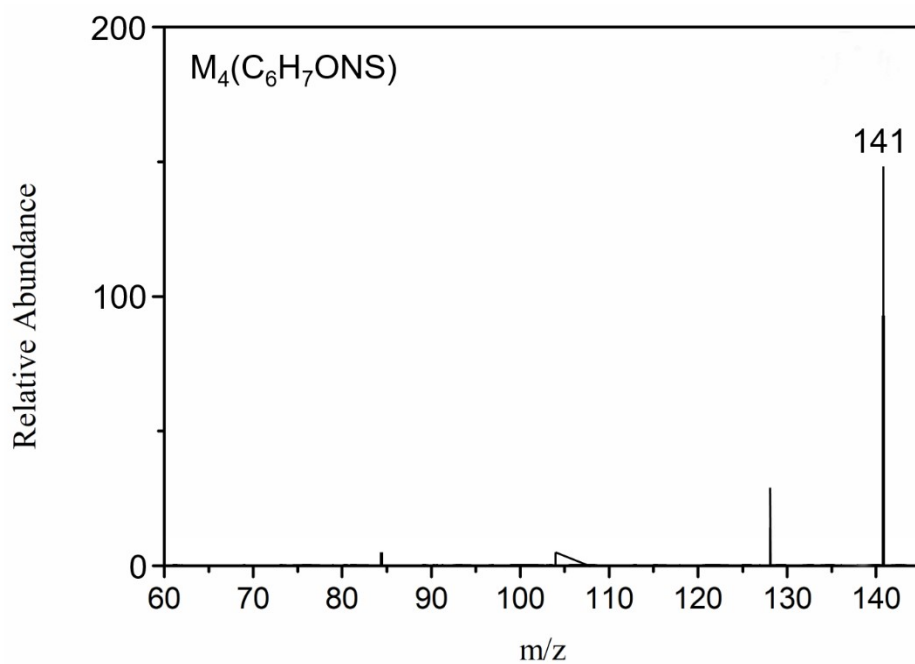

Fig. S8 Mass spectrum of reaction products  $M_4$  during photocatalytic degradation of MB.

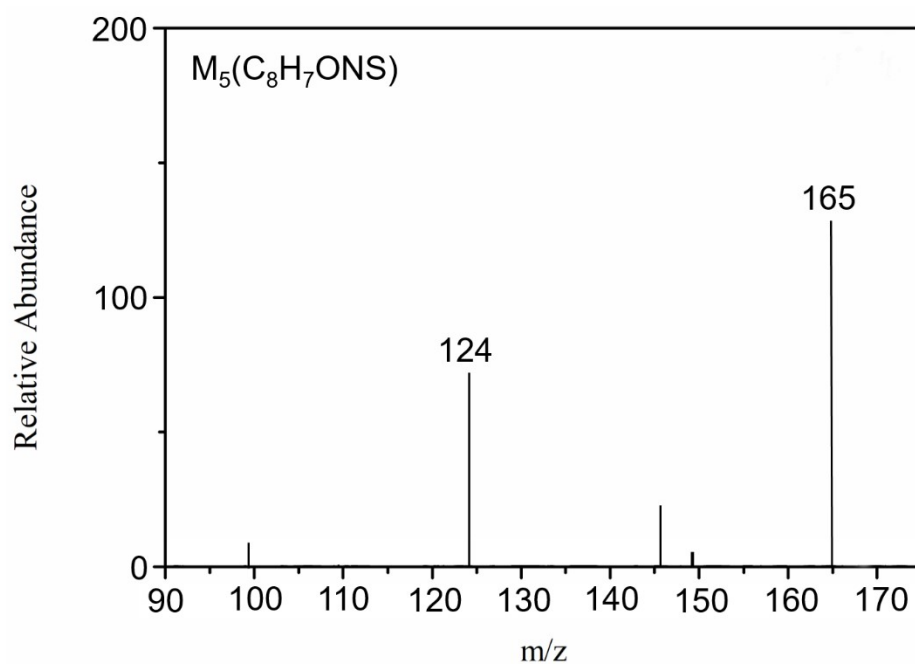

Fig. S9 Mass spectrum of reaction products  $M_5$  during photocatalytic degradation of MB.

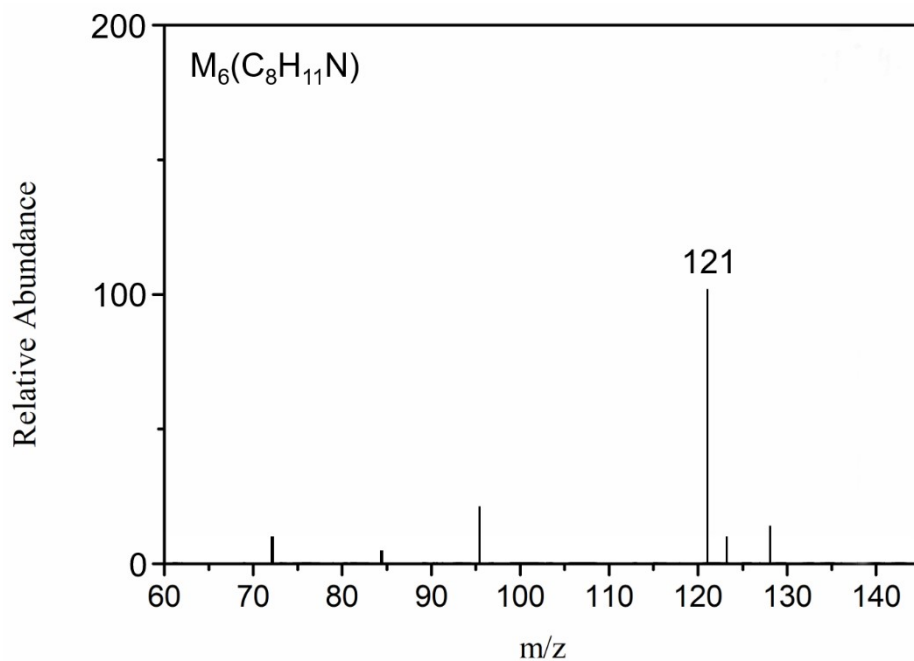

Fig. S10 Mass spectrum of reaction products  $M_6$  during photocatalytic degradation of MB.

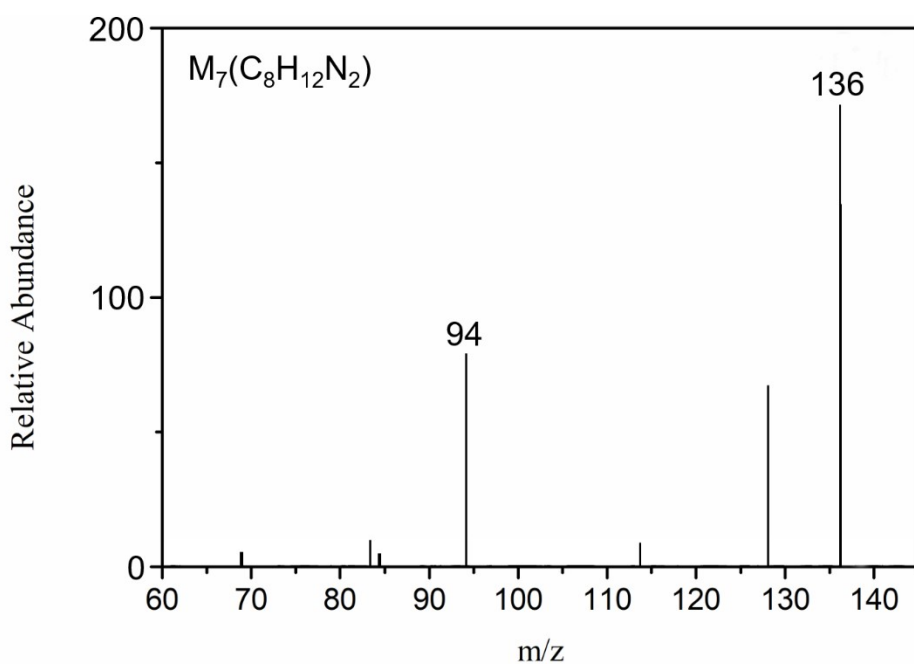

Fig. S11 Mass spectrum of reaction products  $M_7$  during photocatalytic degradation of MB.

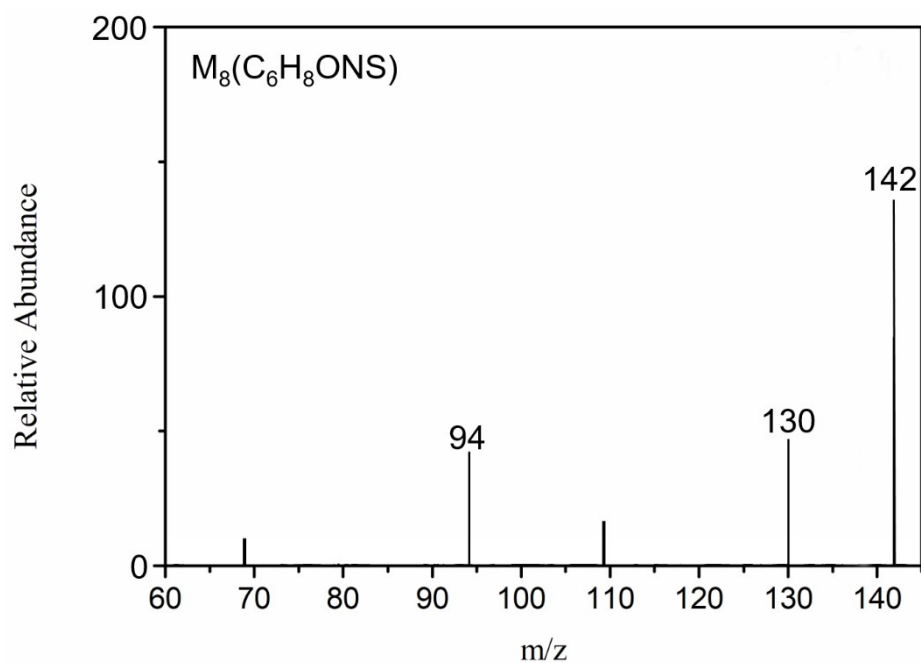

Fig. S12 Mass spectrum of reaction products  $M_8$  during photocatalytic degradation of MB.

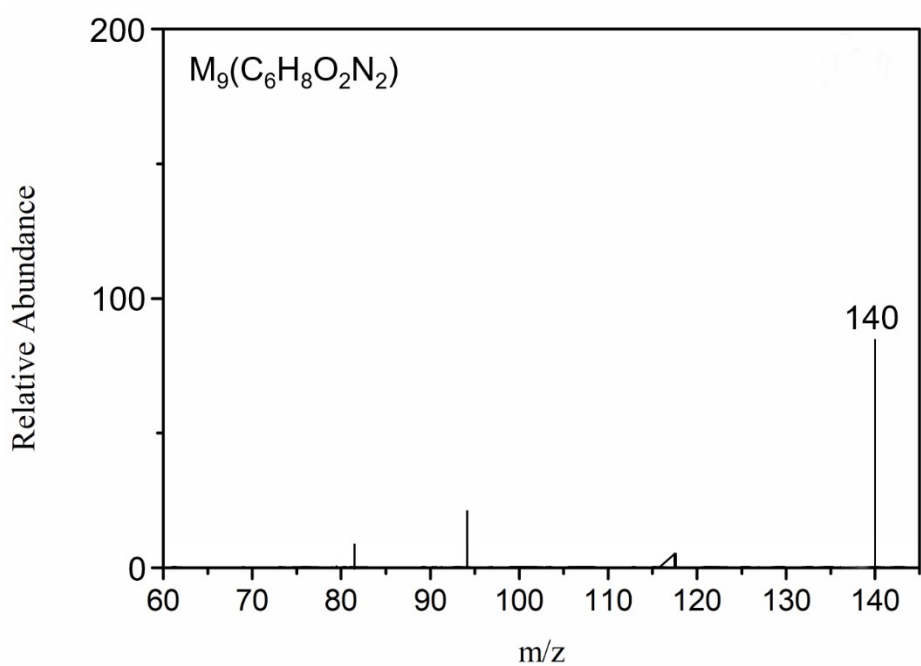

Fig. S13 Mass spectrum of reaction products  $M_9$  during photocatalytic degradation of MB.

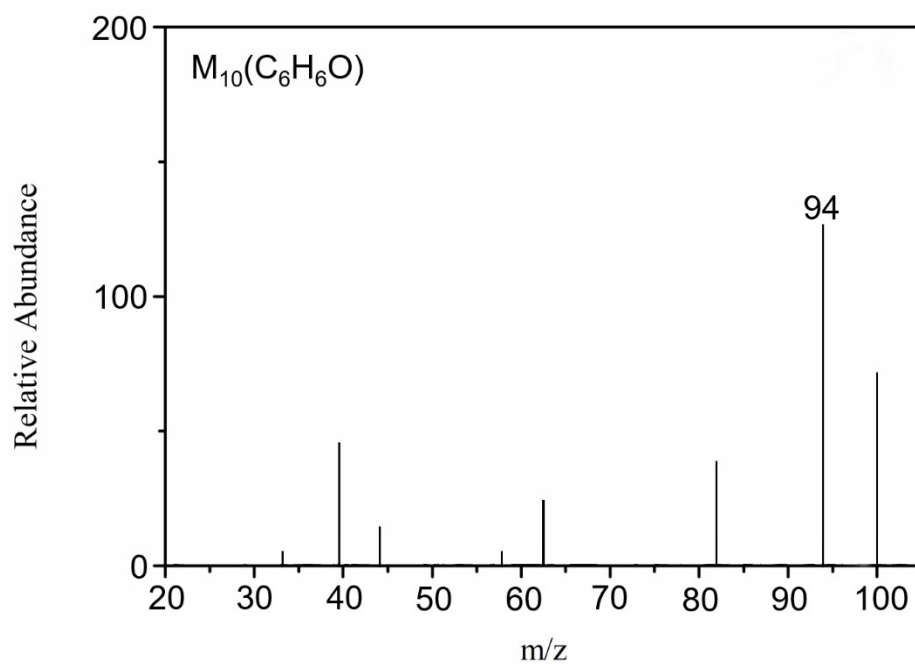

Fig. S14 Mass spectrum of reaction products  $M_{10}$  during photocatalytic degradation of MB.

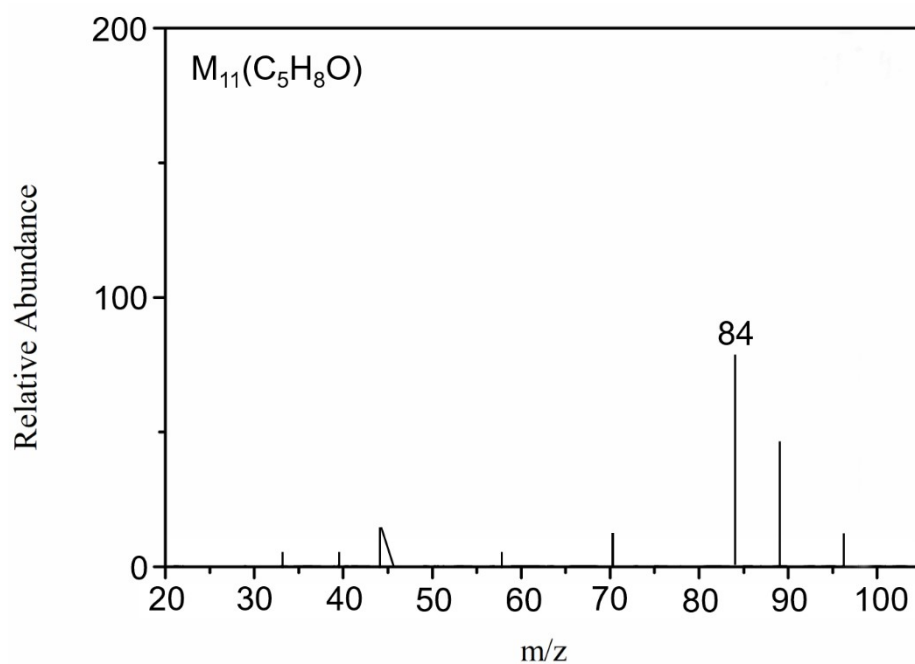

Fig. S15 Mass spectrum of reaction products  $M_{11}$  during photocatalytic degradation of MB.



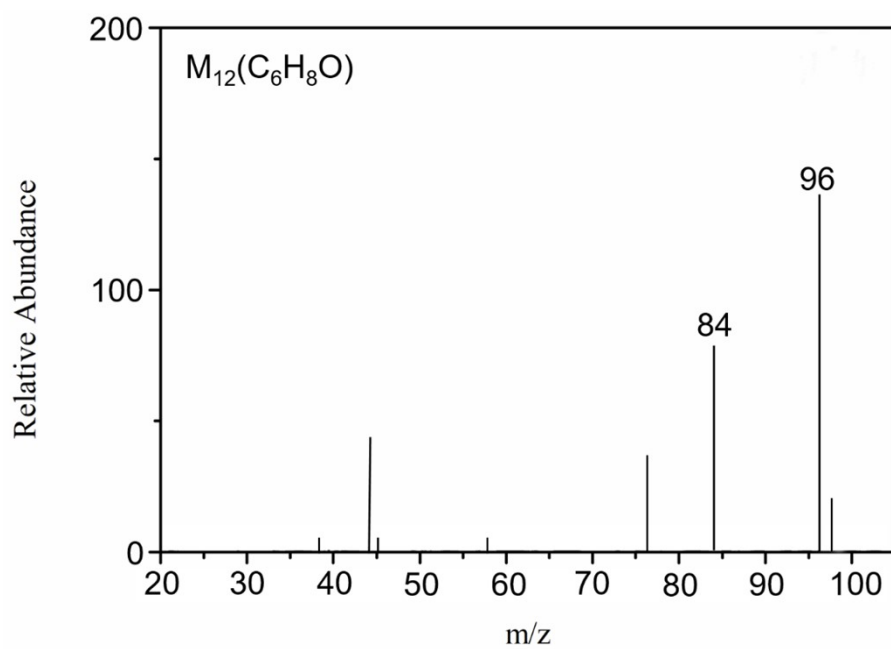

Fig. S16 Mass spectrum of reaction products  $M_{12}$  during photocatalytic degradation of MB.

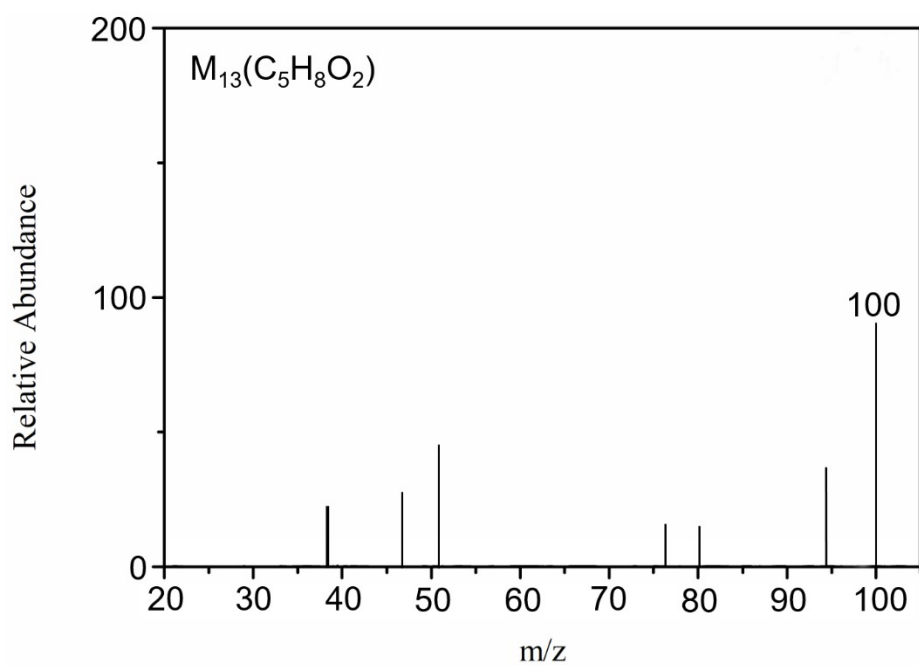

Fig. S17 Mass spectrum of reaction products  $M_{13}$  during photocatalytic degradation of MB.

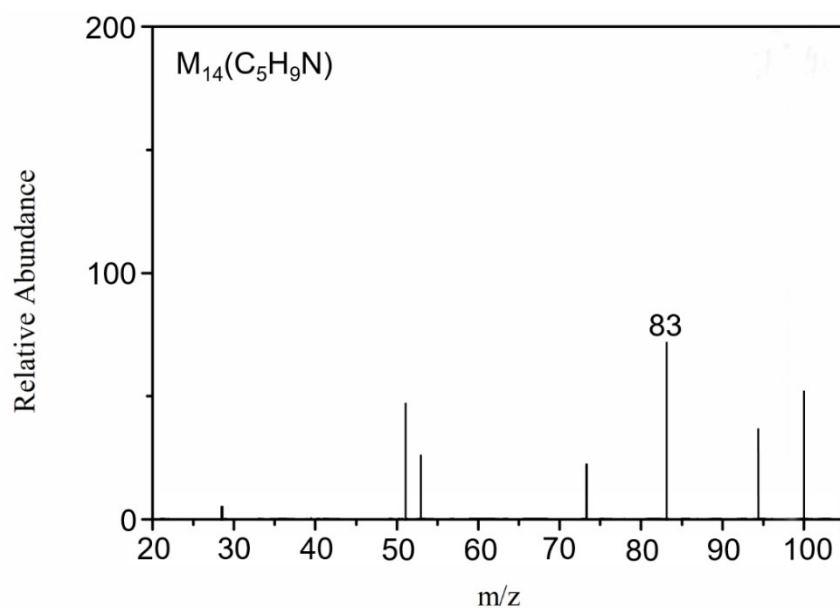

Fig. S18 Mass spectrum of reaction products  $M_{14}$  during photocatalytic degradation of MB.

Table S1. Photocatalytic degradation of methylene blue (MB) performance data comparison.

| Materials                                                                | Response time | Degradation rate | Ref.      |
|--------------------------------------------------------------------------|---------------|------------------|-----------|
| $Ce_{0.9}Zr_{0.1}O_2$                                                    | 120 min       | 99.04%           | This work |
| B-TiO <sub>2</sub> /MIL-100(Fe)                                          | 60 min        | 91.12%           | 1         |
| ZnS/Cu-2%                                                                | 360 min       | 56%              | 2         |
| Cr/CeO <sub>2</sub>                                                      | 100 min       | 59%              | 3         |
| Pd/TiO <sub>2</sub>                                                      | 120 min       | 96.90%           | 4         |
| Ag/CoFe <sub>2</sub> O <sub>4</sub>                                      | 30 min        | >95%             | 5         |
| TM-2-d                                                                   | 720 min       | 96%              | 6         |
| SiO <sub>2</sub> commercial ceramic supports                             | 300 min       | 94%              | 7         |
| 0.1% Ag-ZnO                                                              | 210 min       | 92.90%           | 8         |
| Bi <sub>0.9</sub> Gd <sub>0.07</sub> La <sub>0.03</sub> FeO <sub>3</sub> | 90 min        | 95%              | 9         |
| 3at% Tb-doped                                                            | 150 min       | 98.20%           | 10        |

## References

1. Liu, L.; Liu, Y.; Wang, X.; Hu, N.; Li, Y.; Li, C.; Meng, Y.; An, Y., Synergistic effect of B-TiO<sub>2</sub> and MIL-100(Fe) for high-efficiency photocatalysis in methylene blue degradation. *Applied Surface Science* **2021**, *561*.
2. Mehrabian, M.; Esteki, Z., Degradation of methylene blue by photocatalysis of copper assisted ZnS nanoparticle thin films. *Optik* **2017**, *130*, 1168-1172.
3. Habib, I. Y.; Burhan, J.; Jaladi, F.; Lim, C. M.; Usman, A.; Kumara, N. T. R. N.; Tsang, S. C. E.; Mahadi, A. H., Effect of Cr doping in CeO<sub>2</sub> nanostructures on photocatalysis and H<sub>2</sub>O<sub>2</sub> assisted methylene blue dye degradation. *Catalysis Today* **2021**, *375*, 506-513.
4. Nguyen, C. H.; Fu, C.-C.; Juang, R.-S., Degradation of methylene blue and methyl orange by palladium-doped TiO<sub>2</sub> photocatalysis for water reuse: Efficiency and degradation pathways. *Journal of Cleaner Production* **2018**, *202*, 413-427.
5. Feng, X.; Ma, L.; Cai, F.; Sun, C.; Ding, H., Ag/CoFe<sub>2</sub>O<sub>4</sub> as a Fenton-Like Catalyst for the Degradation of Methylene Blue. *ChemistrySelect* **2022**, *7* (22).
6. Zhao, T.; Liu, R.; Lu, J.; Zhu, X.; Zhu, X.; Lu, K.; Zhu, H., Photocatalytic degradation of methylene blue solution by diphenylanthrazoline compounds. *Journal of Physical Organic Chemistry* **2017**, *30* (12).
7. Zarazúa-Morín, M. E.; Galindo-Luna, A. S.; Gallegos-Sánchez, V. J.; Juárez-Ramírez, I., Chemical exfoliation of silica filters used on methylene blue degradation by photocatalysis. *Chemical Papers* **2022**, *76* (9), 5627-5642.
8. Kwon, D.; Kim, J., Silver-doped ZnO for photocatalytic degradation of methylene blue. *Korean Journal of Chemical Engineering* **2020**, *37* (7), 1226-1232.
9. Mani, A. D.; Li, J.; Wang, Z.; Zhou, J.; Xiang, H.; Zhao, J.; Deng, L.; Yang, H.; Yao, L., Coupling of piezocatalysis and photocatalysis for efficient degradation of methylene blue by Bi<sub>0.9</sub>Gd<sub>0.07</sub>La<sub>0.03</sub>FeO<sub>3</sub> nanotubes. *Journal of Advanced Ceramics* **2022**, *11* (7), 1069-1081.
10. Chen, W.-S.; Wu, M.-H.; Wu, J.-Y., Effects of Tb-Doped BiVO<sub>4</sub> on Degradation of Methylene Blue. *Sustainability* **2023**, *15* (8).
